# Supplementary material
Source: PubMed Central journal article supplement (PMC8039838)
Supplement: NIHMS1685068-supplement-supplementary_tables.pdf [file NIHMS1685068-supplement-supplementary_tables.pdf]

# Phenylalanine is a novel marker for radiographic knee osteoarthritis progression: the MOST study

**Running title:** Phenylalanine and knee OA progression

Guangju Zhai<sup>1\*</sup>, Xianbang Sun<sup>2</sup>, Edward Randell<sup>3</sup>, Ming Liu<sup>1</sup>, Na Wang<sup>4</sup>, Irina Tolstykh<sup>5</sup>, Proton Rahman<sup>6</sup>, James Torner<sup>7</sup>, Cora E. Lewis<sup>8</sup>, Michael C. Nevitt<sup>5</sup>, Ali Guermazi<sup>9</sup>, Frank Roemer<sup>9</sup>, David T. Felson<sup>2,10</sup>

<sup>1</sup>Discipline of Genetics, <sup>3</sup>Division of Laboratory Medicine, <sup>6</sup>Discipline of Medicine, Faculty of Medicine, Memorial University of Newfoundland, St. John's, Canada

<sup>2</sup>Department of Rheumatology, <sup>9</sup>Department of Radiology, Boston University School of Medicine, Boston, USA

<sup>4</sup>Biostatistics and Epidemiology Data Analytics Center, Boston University School of Public Health, Boston, USA

<sup>5</sup>Epidemiology and Biostatistics, U. California, San Francisco, USA

<sup>7</sup>Department of Epidemiology, University of Iowa, Iowa, USA

<sup>8</sup>Department of Epidemiology, University of Alabama, Birmingham, USA

<sup>10</sup> NIHR Manchester Biomedical Research Centre, Manchester Academic Health Science Centre, Manchester University NHS Foundation Trust, Manchester, UK

**The sources of support:** The current study was supported by Canadian Institutes of Health Research (FRN153298) and the original study of the MOST was supported by National Institutes of Health and National Institute on Aging (Felson – U01 AG18820; Lewis – U01 AG18947; Nevitt – U01 AG19069; Torner – U01 AG18832).

**Conflicts of interest:** Both AG and FR are shareholders of Boston Imaging Core Lab (BIC), LLC. All other authors have no conflict of interest to declare.

**\*Corresponding author:** Dr. Guangju Zhai, Discipline of Genetics, Memorial University of Newfoundland, St. John's, NL, Canada, A1B 3V6; Tel: 709 864 6683; Email: [guangju.zhai@med.mun.ca](mailto:guangju.zhai@med.mun.ca); ORCID iD: <https://orcid.org/0000-0002-7263-0605>

**Supplementary Table 1.** List of metabolite concentrations determined using the Biocrates AbsoluteIDQ kit

| Metabolite class                     | Number | Metabolite name or abbreviation                                                                                                                                                                                                                                                    | Biological relevance (selected examples)                                                                                                          |
|--------------------------------------|--------|------------------------------------------------------------------------------------------------------------------------------------------------------------------------------------------------------------------------------------------------------------------------------------|---------------------------------------------------------------------------------------------------------------------------------------------------|
| Amino acids                          | 21     | Alanine, arginine, asparagine, aspartate, citrulline, glutamine, glutamate, glycine, histidine, isoleucine, leucine, lysine, methionine, ornithine, phenylalanine, proline, serine, threonine, tryptophan, tyrosine, valine                                                        | Amino acid metabolism, urea-cycle, activity of gluconeogenesis and glycolysis, insulin sensitivity, neurotransmitter metabolism, oxidative stress |
| Carnitine                            | 1      | C0                                                                                                                                                                                                                                                                                 |                                                                                                                                                   |
| Acylcarnitine                        | 25     | C2, C3, C3:1, C4, C4:1, C5, C5:1, C6(or C4:1-DC), C6:1, C8, C9, C10, C10:1, C10:2, C12, C12:1, C14, C14:1, C14:2, C16, C16:1, C16:2, C18, C18:1, C18:2                                                                                                                             | Energy metabolism, fatty acid transport and mitochondrial fatty acid oxidation, ketosis, oxidative stress, mitochondrial membrane damage          |
| Hydroxy- and dicarboxyacylcarnitines | 14     | C3-OH, C4-OH(or C3-DC), C5:1-DC, C5-DC(or C6-OH), C5-M-DC, C5-OH(or C3-DC-M), C7-DC, C12-DC, C14:1-OH, C14:2-OH, C16:1-OH, C16:2-OH, C16-OH, C18:1-OH                                                                                                                              |                                                                                                                                                   |
| Biogenic amines                      | 19     | acetylmethionine, asymmetric dimethylarginine, total dimethylarginine, alpha-Aminoadipic acid, carnosine, creatinine, histamine, kynurenine, methioninesulfoxide, nitrotyrosine, hydroxyproline, phenylethylamine, putrescine, sarcosine, serotonin, spermidine, spermine, taurine |                                                                                                                                                   |
| Lyso-phosphatidylcholines            | 14     | lysoPC a C14:0/C16:0/C16:1/C17:0/C18:0/C18:1/C18:2/C20:3/C20:4/C26:0/C26:1/C28:0/C28:1                                                                                                                                                                                             | Degradation of phospholipids, membrane damage, signalling cascades, fatty acid profile                                                            |
| Diacyl-phosphatidylcholines          | 38     | PC aa C24:0/C26:0/C28:1/C30:0/C30:2/C32:0/C32:1/C32:2/C32:3/C34:1/C34:2/C34:3/C34:4/C36:0/C36:1/C36:2/C36:3/C36:4/C36:5/C36:6/C38:0/C38:1/C38:3/C38:4/C38:5/C38:6/C40:1/C40:2/C40:3/C40:4/C40:5/C40:6/C42:0/C42:1/C42:2/C42:4/C42:5/C42:6                                          | Dyslipidaemia, membrane composition and damage, fatty acid profile, activity of desaturases                                                       |
| Acyl-alkyl-phosphatidylcholines      | 38     | PC ae C30:0/C30:2/C32:1/C32:2/C34:0/C34:1/C34:2/C34:3/C36:0/C36:1/C36:2/C36:3/C36:4/C36:5/C38:0/C38:1/C38:2/C38:3/C38:4/C38:5/C38:6/C40:1/C40:2/C40:3/C40:4/C40:5/C40:6/C42:0/C42:1/C42:2/C42:3/C42:4/C42:5/C44:3/C44:4/C44:5/C44:6                                                |                                                                                                                                                   |
| Sphingomyelins                       | 10     | SM C16:0, SM C16:1, SM C18:0, SM C18:1, SM C20:2, SM C22:3, SM C24:0, SM C24:1, SM C26:0, SM C26:1                                                                                                                                                                                 | Signalling cascades, membrane damage (eg, neurodegeneration)                                                                                      |
| Hydroxysphingomyelins                | 5      | SM (OH) C14:1, SM (OH) C16:1, SM (OH) C22:1, SM (OH) C22:2, SM (OH) C24:1                                                                                                                                                                                                          |                                                                                                                                                   |
| Hexose                               | 1      | H1                                                                                                                                                                                                                                                                                 | Carbohydrate metabolism                                                                                                                           |
| Total                                | 186    |                                                                                                                                                                                                                                                                                    |                                                                                                                                                   |

aa, acyl-acyl; ae, acyl-alkyl; a, lyso; Cx:y, where x is the number of carbons in the fatty acid side chain; y is the number of double bonds in the fatty acid side chain; DC, decarboxyl; M, methyl; OH, hydroxyl; PC, phosphatidylcholine; SM, sphingomyelin

Supplementary Table 2. The association between knee progression and each of the 157 metabolites.

Note: 1 - group 1; 2 - group 2; 3 - the combined of the group 1 and 2. Beta and SE were logistic regression coefficients and standard error.

| <b>Metabolites</b> | <b>Beta 1</b> | <b>SE 1</b> | <b>P value 1</b> | <b>Beta 2</b> | <b>SE 2</b> | <b>P value 2</b> | <b>Beta 3</b> | <b>SE 3</b> | <b>P value 3</b> |
|--------------------|---------------|-------------|------------------|---------------|-------------|------------------|---------------|-------------|------------------|
| Phenylalanine      | 0.51          | 0.17        | 0.0036           | 0.31          | 0.12        | 0.0089           | 0.38          | 0.10        | 0.0001           |
| Serine             | 0.23          | 0.16        | 0.1593           | 0.35          | 0.13        | 0.0077           | 0.30          | 0.10        | 0.0034           |
| PC_ae_C36_2        | 0.16          | 0.15        | 0.2953           | 0.36          | 0.13        | 0.0060           | 0.27          | 0.10        | 0.0064           |
| Arginine           | 0.39          | 0.16        | 0.0135           | 0.18          | 0.12        | 0.1289           | 0.25          | 0.10        | 0.0075           |
| C0                 | 0.53          | 0.18        | 0.0026           | 0.12          | 0.12        | 0.3257           | 0.26          | 0.10        | 0.0100           |
| Leucine            | 0.39          | 0.18        | 0.0332           | 0.22          | 0.13        | 0.0928           | 0.26          | 0.10        | 0.0120           |
| PC_ae_C40_6        | 0.21          | 0.17        | 0.2166           | 0.30          | 0.13        | 0.0207           | 0.24          | 0.10        | 0.0157           |
| Asparagine         | 0.20          | 0.16        | 0.2215           | 0.25          | 0.12        | 0.0378           | 0.23          | 0.10        | 0.0164           |
| PC_ae_C34_0        | 0.20          | 0.16        | 0.1932           | 0.24          | 0.13        | 0.0542           | 0.23          | 0.10        | 0.0172           |
| PC_ae_C34_2        | 0.11          | 0.16        | 0.4753           | 0.33          | 0.13        | 0.0141           | 0.23          | 0.10        | 0.0204           |
| PC_ae_C36_1        | 0.21          | 0.15        | 0.1754           | 0.25          | 0.13        | 0.0565           | 0.22          | 0.10        | 0.0245           |
| PC_ae_C34_3        | 0.11          | 0.16        | 0.4642           | 0.31          | 0.13        | 0.0219           | 0.22          | 0.10        | 0.0272           |
| PC_ae_C38_4        | 0.10          | 0.15        | 0.5042           | 0.31          | 0.13        | 0.0165           | 0.21          | 0.10        | 0.0280           |
| PC_ae_C34_1        | 0.17          | 0.16        | 0.2855           | 0.27          | 0.13        | 0.0434           | 0.22          | 0.10        | 0.0303           |
| Histidine          | 0.08          | 0.16        | 0.6099           | 0.29          | 0.13        | 0.0230           | 0.20          | 0.10        | 0.0357           |
| Glycine            | 0.17          | 0.17        | 0.3144           | 0.23          | 0.12        | 0.0598           | 0.21          | 0.10        | 0.0364           |
| PC_ae_C36_3        | 0.04          | 0.15        | 0.8052           | 0.34          | 0.13        | 0.0110           | 0.21          | 0.10        | 0.0385           |
| PC_ae_C38_5        | 0.10          | 0.15        | 0.5148           | 0.28          | 0.13        | 0.0346           | 0.19          | 0.10        | 0.0500           |
| Threonine          | 0.31          | 0.16        | 0.0556           | 0.12          | 0.12        | 0.3004           | 0.18          | 0.09        | 0.0528           |
| Tyrosine           | 0.34          | 0.18        | 0.0630           | 0.13          | 0.11        | 0.2534           | 0.19          | 0.10        | 0.0528           |
| Isoleucine         | 0.38          | 0.18        | 0.0368           | 0.11          | 0.13        | 0.3976           | 0.21          | 0.11        | 0.0563           |
| Ornithine          | 0.10          | 0.15        | 0.5294           | 0.27          | 0.13        | 0.0295           | 0.18          | 0.10        | 0.0627           |
| Methionine         | 0.29          | 0.17        | 0.0771           | 0.13          | 0.12        | 0.2693           | 0.18          | 0.10        | 0.0693           |
| Hexose             | 0.16          | 0.14        | 0.2536           | 0.17          | 0.13        | 0.2082           | 0.17          | 0.10        | 0.0768           |
| PC_ae_C38_6        | 0.14          | 0.16        | 0.4032           | 0.22          | 0.14        | 0.0972           | 0.18          | 0.10        | 0.0855           |
| Valine             | 0.21          | 0.17        | 0.2012           | 0.16          | 0.13        | 0.2205           | 0.18          | 0.10        | 0.0872           |
| PC_aa_C40_6        | 0.20          | 0.15        | 0.2048           | 0.18          | 0.13        | 0.1670           | 0.17          | 0.10        | 0.0920           |
| PC_aa_C36_2        | 0.09          | 0.15        | 0.5175           | 0.23          | 0.13        | 0.0782           | 0.16          | 0.10        | 0.0939           |
| Tryptophan         | -0.07         | 0.15        | 0.6242           | 0.31          | 0.12        | 0.0097           | 0.15          | 0.09        | 0.0968           |
| PC_ae_C36_4        | 0.09          | 0.15        | 0.5329           | 0.20          | 0.13        | 0.1167           | 0.16          | 0.10        | 0.1053           |

|                     |       |      |        |       |      |        |      |      |        |
|---------------------|-------|------|--------|-------|------|--------|------|------|--------|
| PC_aa_C38_0         | 0.13  | 0.16 | 0.4191 | 0.22  | 0.14 | 0.1097 | 0.16 | 0.10 | 0.1065 |
| PC_aa_C32_0         | 0.20  | 0.16 | 0.2175 | 0.14  | 0.13 | 0.2901 | 0.16 | 0.10 | 0.1113 |
| PC_aa_C42_0         | 0.21  | 0.16 | 0.1763 | 0.14  | 0.13 | 0.2497 | 0.15 | 0.10 | 0.1124 |
| C5                  | 0.62  | 0.18 | 0.0005 | -0.09 | 0.13 | 0.4658 | 0.16 | 0.10 | 0.1161 |
| Lysine              | -0.03 | 0.15 | 0.8196 | 0.26  | 0.12 | 0.0270 | 0.14 | 0.09 | 0.1241 |
| PC_ae_C38_3         | 0.14  | 0.15 | 0.3461 | 0.17  | 0.13 | 0.1954 | 0.15 | 0.10 | 0.1268 |
| PC_ae_C40_5         | 0.05  | 0.15 | 0.7531 | 0.24  | 0.13 | 0.0611 | 0.15 | 0.10 | 0.1294 |
| PC_ae_C38_2         | 0.07  | 0.15 | 0.6416 | 0.24  | 0.14 | 0.0766 | 0.15 | 0.10 | 0.1325 |
| PC_ae_C40_4         | 0.01  | 0.15 | 0.9553 | 0.25  | 0.13 | 0.0529 | 0.14 | 0.10 | 0.1529 |
| Glutamine           | 0.01  | 0.16 | 0.9299 | 0.21  | 0.12 | 0.0817 | 0.13 | 0.09 | 0.1557 |
| Kynurenine          | 0.15  | 0.15 | 0.3054 | 0.16  | 0.13 | 0.2116 | 0.13 | 0.10 | 0.1593 |
| PC_ae_C44_3         | 0.08  | 0.16 | 0.6208 | 0.17  | 0.12 | 0.1501 | 0.13 | 0.10 | 0.1610 |
| PC_ae_C30_1         | 0.01  | 0.16 | 0.9338 | 0.18  | 0.12 | 0.1250 | 0.13 | 0.10 | 0.1666 |
| PC_ae_C42_4         | 0.06  | 0.15 | 0.6996 | 0.19  | 0.13 | 0.1303 | 0.13 | 0.10 | 0.1706 |
| PC_ae_C36_5         | 0.14  | 0.15 | 0.3664 | 0.13  | 0.13 | 0.3086 | 0.13 | 0.10 | 0.1714 |
| PC_ae_C32_1         | 0.09  | 0.16 | 0.5798 | 0.18  | 0.13 | 0.1725 | 0.14 | 0.10 | 0.1721 |
| PC_aa_C42_4         | 0.21  | 0.16 | 0.1954 | 0.12  | 0.13 | 0.3700 | 0.14 | 0.10 | 0.1725 |
| PC_aa_C38_6         | 0.12  | 0.16 | 0.4604 | 0.17  | 0.13 | 0.1798 | 0.13 | 0.10 | 0.1756 |
| Alanine             | 0.05  | 0.16 | 0.7809 | 0.17  | 0.12 | 0.1503 | 0.13 | 0.09 | 0.1821 |
| lysoPC_a_C17_0      | 0.20  | 0.20 | 0.3308 | 0.10  | 0.10 | 0.3297 | 0.12 | 0.09 | 0.1857 |
| PC_ae_C44_6         | 0.06  | 0.16 | 0.7100 | 0.20  | 0.13 | 0.1239 | 0.13 | 0.10 | 0.1967 |
| PC_aa_C42_6         | 0.15  | 0.15 | 0.3437 | 0.16  | 0.14 | 0.2379 | 0.13 | 0.10 | 0.2119 |
| trans_hydroxyprolin | 0.05  | 0.17 | 0.7809 | 0.18  | 0.13 | 0.1619 | 0.12 | 0.10 | 0.2170 |
| PC_ae_C42_3         | 0.09  | 0.16 | 0.5885 | 0.18  | 0.13 | 0.1650 | 0.12 | 0.10 | 0.2180 |
| PC_ae_C42_5         | 0.05  | 0.15 | 0.7503 | 0.20  | 0.13 | 0.1299 | 0.12 | 0.10 | 0.2185 |
| PC_aa_C32_3         | 0.12  | 0.17 | 0.4801 | 0.14  | 0.14 | 0.2980 | 0.13 | 0.11 | 0.2291 |
| PC_aa_C34_2         | 0.05  | 0.15 | 0.7182 | 0.17  | 0.13 | 0.1909 | 0.12 | 0.10 | 0.2297 |
| PC_ae_C44_4         | 0.13  | 0.16 | 0.4213 | 0.11  | 0.11 | 0.3301 | 0.11 | 0.09 | 0.2335 |
| Proline             | 0.32  | 0.16 | 0.0425 | -0.01 | 0.12 | 0.9229 | 0.11 | 0.09 | 0.2352 |
| PC_aa_C40_1         | 0.13  | 0.16 | 0.4039 | 0.14  | 0.13 | 0.2825 | 0.12 | 0.10 | 0.2509 |
| PC_ae_C42_0         | 0.21  | 0.16 | 0.1883 | 0.11  | 0.13 | 0.4276 | 0.11 | 0.10 | 0.2510 |

|                |       |      |        |       |      |        |       |      |        |
|----------------|-------|------|--------|-------|------|--------|-------|------|--------|
| C12_1          | -0.26 | 0.16 | 0.1084 | 0.01  | 0.13 | 0.9366 | -0.11 | 0.10 | 0.2646 |
| PC_aa_C38_4    | 0.15  | 0.16 | 0.3466 | 0.11  | 0.13 | 0.4103 | 0.11  | 0.10 | 0.2838 |
| Citruline      | 0.22  | 0.16 | 0.1710 | 0.04  | 0.12 | 0.7441 | 0.10  | 0.09 | 0.2869 |
| PC_ae_C40_2    | 0.14  | 0.15 | 0.3595 | 0.10  | 0.14 | 0.4548 | 0.10  | 0.10 | 0.3051 |
| PC_aa_C38_5    | 0.11  | 0.16 | 0.5045 | 0.13  | 0.13 | 0.3244 | 0.10  | 0.10 | 0.3086 |
| PC_aa_C36_1    | 0.09  | 0.14 | 0.5392 | 0.11  | 0.13 | 0.4125 | 0.09  | 0.10 | 0.3245 |
| PC_aa_C28_1    | 0.08  | 0.16 | 0.6163 | 0.12  | 0.13 | 0.3469 | 0.10  | 0.10 | 0.3329 |
| PC_ae_C42_2    | 0.14  | 0.16 | 0.3881 | 0.10  | 0.13 | 0.4430 | 0.10  | 0.10 | 0.3336 |
| C14_1          | -0.22 | 0.18 | 0.2137 | -0.02 | 0.11 | 0.8433 | -0.08 | 0.09 | 0.3473 |
| lysoPC_a_C18_0 | 0.17  | 0.22 | 0.4256 | 0.06  | 0.10 | 0.5314 | 0.08  | 0.09 | 0.3535 |
| PC_aa_C36_3    | 0.01  | 0.15 | 0.9466 | 0.16  | 0.13 | 0.2029 | 0.09  | 0.10 | 0.3569 |
| PC_ae_C44_5    | 0.06  | 0.15 | 0.6795 | 0.13  | 0.13 | 0.3207 | 0.09  | 0.10 | 0.3711 |
| PC_aa_C36_0    | 0.10  | 0.17 | 0.5489 | 0.09  | 0.12 | 0.4444 | 0.08  | 0.10 | 0.3900 |
| lysoPC_a_C20_4 | 0.21  | 0.20 | 0.2938 | 0.04  | 0.10 | 0.6861 | 0.08  | 0.09 | 0.3922 |
| PC_aa_C36_4    | 0.11  | 0.16 | 0.5064 | 0.08  | 0.13 | 0.5117 | 0.09  | 0.10 | 0.3932 |
| PC_aa_C36_6    | 0.15  | 0.16 | 0.3566 | 0.05  | 0.12 | 0.6823 | 0.08  | 0.10 | 0.3979 |
| C5_1_DC        | 0.20  | 0.15 | 0.2018 | 0.01  | 0.12 | 0.9541 | 0.08  | 0.10 | 0.4035 |
| C16_2          | -0.08 | 0.18 | 0.6383 | -0.06 | 0.10 | 0.5716 | -0.07 | 0.09 | 0.4175 |
| PC_aa_C40_3    | 0.05  | 0.15 | 0.7384 | 0.12  | 0.13 | 0.3607 | 0.08  | 0.10 | 0.4181 |
| C18_1          | -0.05 | 0.17 | 0.7850 | 0.15  | 0.12 | 0.1977 | 0.07  | 0.09 | 0.4215 |
| PC_ae_C38_0    | 0.06  | 0.17 | 0.7079 | 0.12  | 0.13 | 0.3479 | 0.08  | 0.10 | 0.4278 |
| SM_C26_1       | -0.24 | 0.21 | 0.2442 | -0.01 | 0.11 | 0.9390 | -0.07 | 0.09 | 0.4384 |
| C16            | 0.15  | 0.19 | 0.4343 | 0.06  | 0.12 | 0.6275 | 0.08  | 0.10 | 0.4415 |
| lysoPC_a_C18_2 | 0.15  | 0.20 | 0.4581 | 0.05  | 0.11 | 0.6456 | 0.07  | 0.09 | 0.4442 |
| C14_2          | -0.20 | 0.18 | 0.2641 | -0.01 | 0.10 | 0.9281 | -0.07 | 0.09 | 0.4443 |
| PC_ae_C32_2    | 0.10  | 0.17 | 0.5492 | 0.08  | 0.13 | 0.5471 | 0.08  | 0.10 | 0.4476 |
| C7_DC          | 0.08  | 0.16 | 0.6006 | 0.07  | 0.12 | 0.5600 | 0.07  | 0.10 | 0.4502 |
| PC_aa_C30_0    | 0.16  | 0.15 | 0.2818 | -0.01 | 0.13 | 0.9554 | 0.07  | 0.10 | 0.4513 |
| lysoPC_a_C16_0 | 0.13  | 0.21 | 0.5259 | 0.05  | 0.10 | 0.6159 | 0.06  | 0.09 | 0.4606 |
| C16_1          | -0.17 | 0.20 | 0.3955 | -0.03 | 0.10 | 0.7583 | -0.06 | 0.09 | 0.4632 |
| C14_1_OH       | -0.14 | 0.17 | 0.4152 | -0.03 | 0.10 | 0.7552 | -0.06 | 0.09 | 0.4662 |

|                |       |      |        |       |      |        |       |      |        |
|----------------|-------|------|--------|-------|------|--------|-------|------|--------|
| PC_ae_C40_1    | 0.10  | 0.17 | 0.5626 | 0.08  | 0.13 | 0.5219 | 0.07  | 0.10 | 0.4671 |
| lysoPC_a_C18_1 | 0.15  | 0.21 | 0.4781 | 0.04  | 0.10 | 0.6648 | 0.06  | 0.09 | 0.4779 |
| PC_aa_C42_2    | 0.05  | 0.16 | 0.7366 | 0.09  | 0.12 | 0.4503 | 0.07  | 0.10 | 0.4836 |
| Spermidine     | -0.18 | 0.22 | 0.4164 | -0.04 | 0.16 | 0.8288 | -0.09 | 0.13 | 0.4859 |
| PC_ae_C42_1    | 0.16  | 0.16 | 0.3146 | 0.03  | 0.13 | 0.8184 | 0.07  | 0.10 | 0.4921 |
| PC_aa_C40_5    | 0.06  | 0.15 | 0.6650 | 0.09  | 0.13 | 0.4860 | 0.06  | 0.10 | 0.5017 |
| C3             | 0.27  | 0.15 | 0.0749 | -0.06 | 0.13 | 0.6519 | 0.07  | 0.10 | 0.5035 |
| SM_C26_0       | -0.27 | 0.22 | 0.2210 | 0.00  | 0.11 | 0.9695 | -0.06 | 0.09 | 0.5153 |
| PC_aa_C40_2    | 0.10  | 0.16 | 0.5187 | 0.08  | 0.13 | 0.5656 | 0.06  | 0.10 | 0.5265 |
| PC_aa_C40_4    | 0.08  | 0.15 | 0.5857 | 0.07  | 0.13 | 0.5869 | 0.06  | 0.10 | 0.5348 |
| C18_2          | -0.02 | 0.15 | 0.8957 | 0.11  | 0.12 | 0.3287 | 0.05  | 0.09 | 0.5525 |
| Acetylnithoine | -0.18 | 0.15 | 0.2204 | 0.05  | 0.12 | 0.7069 | -0.05 | 0.09 | 0.5629 |
| PC_aa_C42_1    | 0.06  | 0.16 | 0.7239 | 0.08  | 0.12 | 0.4707 | 0.05  | 0.09 | 0.5812 |
| C6_C4_1_DC_    | -0.09 | 0.17 | 0.5730 | -0.02 | 0.13 | 0.8578 | -0.05 | 0.10 | 0.5821 |
| SM_C24_1       | -0.22 | 0.20 | 0.2814 | 0.01  | 0.11 | 0.9166 | -0.05 | 0.09 | 0.5823 |
| C10_2          | -0.22 | 0.16 | 0.1540 | 0.08  | 0.12 | 0.5148 | -0.05 | 0.10 | 0.5963 |
| PC_aa_C32_1    | 0.00  | 0.15 | 0.9812 | -0.08 | 0.13 | 0.5106 | -0.05 | 0.10 | 0.6006 |
| PC_aa_C38_1    | 0.19  | 0.16 | 0.2492 | -0.03 | 0.13 | 0.8088 | 0.05  | 0.10 | 0.6047 |
| Spermine       | -0.09 | 0.15 | 0.5380 | -0.01 | 0.12 | 0.9274 | -0.04 | 0.09 | 0.6386 |
| C12            | -0.13 | 0.17 | 0.4516 | 0.02  | 0.12 | 0.8860 | -0.05 | 0.10 | 0.6434 |
| C10_1          | -0.07 | 0.16 | 0.6537 | -0.01 | 0.12 | 0.9589 | -0.05 | 0.10 | 0.6460 |
| C4             | 0.23  | 0.15 | 0.1338 | -0.22 | 0.13 | 0.0814 | -0.04 | 0.10 | 0.6475 |
| Creatinine     | 0.15  | 0.16 | 0.3631 | -0.01 | 0.13 | 0.9221 | 0.04  | 0.10 | 0.6526 |
| lysoPC_a_C20_3 | 0.19  | 0.21 | 0.3556 | -0.01 | 0.10 | 0.9401 | 0.04  | 0.09 | 0.6571 |
| PC_aa_C34_3    | 0.04  | 0.16 | 0.8019 | 0.06  | 0.14 | 0.6849 | 0.04  | 0.10 | 0.6630 |
| C16_1_OH       | -0.03 | 0.17 | 0.8768 | -0.04 | 0.11 | 0.7003 | -0.04 | 0.09 | 0.6659 |
| PC_ae_C40_3    | 0.02  | 0.15 | 0.8983 | 0.08  | 0.14 | 0.5685 | 0.04  | 0.10 | 0.6842 |
| C18            | -0.14 | 0.17 | 0.4241 | 0.13  | 0.12 | 0.2523 | 0.04  | 0.09 | 0.6874 |
| Serotonin      | 0.25  | 0.17 | 0.1479 | -0.07 | 0.12 | 0.5293 | 0.04  | 0.09 | 0.6877 |
| PC_aa_C34_1    | 0.01  | 0.15 | 0.9278 | 0.07  | 0.13 | 0.6060 | 0.04  | 0.10 | 0.6905 |
| SM_C16_1       | -0.24 | 0.22 | 0.2815 | 0.03  | 0.11 | 0.7817 | -0.03 | 0.09 | 0.7024 |

|                     |       |      |        |       |      |        |       |      |        |
|---------------------|-------|------|--------|-------|------|--------|-------|------|--------|
| SM_C24_0            | -0.19 | 0.20 | 0.3379 | 0.02  | 0.11 | 0.8429 | -0.03 | 0.09 | 0.7056 |
| SM_C18_0            | -0.31 | 0.24 | 0.1973 | 0.04  | 0.10 | 0.7248 | -0.03 | 0.09 | 0.7131 |
| SM_OH_C24_1         | -0.13 | 0.19 | 0.4848 | 0.01  | 0.10 | 0.9554 | -0.03 | 0.09 | 0.7219 |
| C14                 | -0.09 | 0.17 | 0.5972 | 0.00  | 0.11 | 0.9901 | -0.03 | 0.09 | 0.7318 |
| C10                 | -0.01 | 0.15 | 0.9689 | 0.07  | 0.13 | 0.5714 | 0.03  | 0.10 | 0.7326 |
| PC_aa_C36_5         | 0.09  | 0.16 | 0.5714 | 0.00  | 0.12 | 0.9912 | 0.03  | 0.10 | 0.7441 |
| SM_C16_0            | -0.25 | 0.23 | 0.2845 | 0.03  | 0.10 | 0.7590 | -0.03 | 0.09 | 0.7474 |
| lysoPC_a_C14_0      | 0.06  | 0.19 | 0.7309 | 0.01  | 0.10 | 0.8976 | 0.03  | 0.09 | 0.7664 |
| Glutamic_acid       | 0.01  | 0.17 | 0.9744 | 0.05  | 0.14 | 0.7293 | 0.03  | 0.11 | 0.7667 |
| C8                  | 0.05  | 0.16 | 0.7565 | 0.03  | 0.12 | 0.8202 | 0.03  | 0.10 | 0.7812 |
| PC_aa_C38_3         | 0.00  | 0.15 | 0.9745 | 0.07  | 0.13 | 0.6202 | 0.03  | 0.10 | 0.7848 |
| lysoPC_a_C28_1      | 0.00  | 0.16 | 0.9879 | -0.03 | 0.11 | 0.7737 | -0.02 | 0.09 | 0.7861 |
| Methioninesulfoxide | 0.11  | 0.18 | 0.5488 | -0.03 | 0.11 | 0.8057 | 0.02  | 0.09 | 0.7879 |
| Putrescine          | 0.05  | 0.17 | 0.7630 | -0.07 | 0.13 | 0.6047 | -0.03 | 0.10 | 0.7994 |
| Asymmetric_dimethy  | 0.26  | 0.16 | 0.1092 | -0.11 | 0.13 | 0.4001 | 0.02  | 0.10 | 0.8008 |
| SM_C20_2            | -0.21 | 0.19 | 0.2601 | 0.06  | 0.11 | 0.5944 | -0.02 | 0.09 | 0.8056 |
| Aspartic_acid       | 0.08  | 0.17 | 0.6246 | -0.08 | 0.12 | 0.4854 | -0.02 | 0.09 | 0.8109 |
| alpha_Aminoadipic_  | -0.05 | 0.16 | 0.7413 | 0.00  | 0.12 | 0.9927 | -0.02 | 0.10 | 0.8246 |
| SM_C18_1            | -0.28 | 0.23 | 0.2244 | 0.06  | 0.11 | 0.6042 | -0.02 | 0.09 | 0.8316 |
| Taurine             | 0.27  | 0.17 | 0.1059 | -0.10 | 0.12 | 0.3851 | 0.02  | 0.09 | 0.8531 |
| PC_aa_C42_5         | 0.02  | 0.16 | 0.9186 | 0.00  | 0.14 | 0.9934 | -0.02 | 0.10 | 0.8784 |
| SM_C22_3            | 0.02  | 0.16 | 0.9079 | 0.03  | 0.11 | 0.7559 | 0.01  | 0.09 | 0.8786 |
| PC_ae_C36_0         | 0.01  | 0.15 | 0.9261 | -0.03 | 0.13 | 0.8307 | -0.01 | 0.10 | 0.8927 |
| PC_ae_C30_2         | -0.06 | 0.16 | 0.6872 | 0.02  | 0.12 | 0.8540 | -0.01 | 0.10 | 0.9108 |
| SM_OH_C22_1         | -0.14 | 0.19 | 0.4668 | 0.04  | 0.11 | 0.7026 | -0.01 | 0.09 | 0.9234 |
| PC_aa_C34_4         | 0.11  | 0.17 | 0.5197 | -0.05 | 0.13 | 0.6884 | 0.01  | 0.10 | 0.9316 |
| PC_ae_C30_0         | 0.06  | 0.16 | 0.7219 | -0.06 | 0.12 | 0.6522 | -0.01 | 0.10 | 0.9332 |
| lysoPC_a_C16_1      | 0.02  | 0.16 | 0.9108 | -0.01 | 0.11 | 0.9263 | 0.00  | 0.09 | 0.9621 |
| PC_aa_C32_2         | 0.04  | 0.15 | 0.7881 | -0.04 | 0.13 | 0.7669 | 0.00  | 0.10 | 0.9747 |
| PC_ae_C38_1         | -0.03 | 0.16 | 0.8680 | 0.04  | 0.12 | 0.7157 | 0.00  | 0.09 | 0.9874 |
| SM_OH_C16_1         | -0.18 | 0.20 | 0.3745 | 0.06  | 0.11 | 0.5693 | 0.00  | 0.09 | 0.9967 |

|             |       |      |        |       |      |        |      |      |        |
|-------------|-------|------|--------|-------|------|--------|------|------|--------|
| C2          | 0.15  | 0.15 | 0.3288 | -0.07 | 0.12 | 0.5491 | 0.00 | 0.09 | 0.9974 |
| SM_OH_C14_1 | -0.14 | 0.20 | 0.4639 | 0.05  | 0.11 | 0.6274 | 0.00 | 0.09 | 0.9977 |
| SM_OH_C22_2 | -0.12 | 0.19 | 0.5157 | 0.06  | 0.11 | 0.6137 | 0.00 | 0.09 | 0.9990 |



**Supplementary Table 3. Mean concentrations of phenylalanine in non-progressors, progressors, and the in-betweeners\***

|                 | <b>Non-progressors**</b> | <b>In-betweeners**</b> | <b>Progressors**</b> |
|-----------------|--------------------------|------------------------|----------------------|
| <b>Group 1</b>  | 65.48±0.76               | 67.46±1.54             | 72.13±2.08           |
| <b>Group 2</b>  | 64.28±1.12               | 67.51±3.37             | 68.00±0.96           |
| <b>Combined</b> | 65.04±0.63               | 67.44±1.45             | 69.00±0.89           |

\*Figures are mean±SE and the measurement unit is  $\mu\text{Mol}$ .

\*\*For group 1, participants were classified as progressors if they had radiographic progression in the knee with baseline OA and the contralateral knee developed OA (KL  $\geq 2$ ); for group 2, progressors were participants with both knees with OA showed progression at follow-up. Non-progressors were defined as subjects in groups 1 and 2 in whom neither knee progressed nor developed OA. The in-betweeners in group 1 was subjects who had radiographic progression in the knee with baseline OA but the contralateral knee did not develop OA; for group 2, the in-betweeners were subjects who only had one OA knee progressed. While the mean concentration of phenylalanine was statistically significant between non-progressors and progressors as presented in Table 1 in the text of the manuscript, it was not significantly different between non-progressors and in-betweeners.
